## Is there a role for tedizolid in the treatment of non-tuberculous mycobacterial disease?

Mike Marvin Ruth <sup>1</sup>, Valerie A. C. M. Koeken<sup>2</sup>, Lian J. Pennings<sup>1</sup>, Elin M. Svensson<sup>3,4</sup>, Heiman F. L. Wertheim<sup>1</sup>, Wouter Hoefsloot<sup>5</sup> and Jakko van Ingen <sup>1\*</sup>

<sup>1</sup>Radboudumc Center for Infectious Diseases, Department of Medical Microbiology, Radboud University Medical Center, Nijmegen, The Netherlands; <sup>2</sup>Radboudumc Center for Infectious Diseases, Department of Internal Medicine, Radboud University Medical Center, Nijmegen, The Netherlands; <sup>3</sup>Radboudumc Center for Infectious Diseases, Department of Pharmacy, Radboud University Medical Center, Nijmegen, The Netherlands; <sup>4</sup>Department of Pharmaceutical Biosciences, Uppsala University, Uppsala, Sweden; <sup>5</sup>Radboudumc Center for Infectious Diseases, Department of Pulmonary Diseases, Radboud University Medical Center, Nijmegen, The Netherlands

\*Corresponding author. E-mail: Jakko.vaningen@radboudumc.nl

Received 26 September 2019; returned 1 November 2019; revised 6 November 2019; accepted 8 November 2019

**Background:** Pulmonary infections caused by non-tuberculous mycobacteria (NTM) are hard to treat and have low cure rates despite intensive multidrug therapy.

**Objectives:** To assess the feasibility of tedizolid, a new oxazolidinone, for the treatment of *Mycobacterium avium* and *Mycobacterium abscessus*.

**Methods:** We determined MICs of tedizolid for 113 isolates of NTM. Synergy with key antimycobacterial drugs was assessed using the checkerboard method and calculation of the FIC index (FICI). We performed time–kill kinetics assays of tedizolid alone and combined with amikacin for *M. abscessus* and with ethambutol for *M. avium*. Human macrophages were infected with *M. abscessus* and *M. avium* and subsequently treated with tedizolid; intracellular and extracellular cfu were quantified over time.

**Results:** NTM isolates generally had a lower MIC of tedizolid than of linezolid. FICIs were lowest between tedizolid and amikacin for *M. abscessus* (FICI=0.75) and between tedizolid and ethambutol for *M. avium* (FICI=0.72). Clarithromycin and tedizolid showed initial synergy, which was abrogated by *erm*(41)-induced macrolide resistance (FICI=0.53). Tedizolid had a weak bacteriostatic effect on *M. abscessus* and combination with amikacin slightly prolonged its effect. Tedizolid had concentration-dependent activity against *M. avium* and its efficacy was enhanced by ethambutol. Both combinations had a concentration-dependent synergistic effect. Tedizolid could inhibit the intracellular bacterial population of both *M. avium* and *M. abscessus*.

**Conclusions:** Tedizolid should be further investigated in pharmacodynamic studies and clinical trials for *M. avium* complex pulmonary disease. It is less active against *M. abscessus*, but still promising.

### Introduction

Non-tuberculous mycobacteria (NTM) are causative agents of chronic, opportunistic pulmonary infections in susceptible patient populations.<sup>1</sup> In NTM pulmonary disease (NTM-PD) *Mycobacterium avium* complex (MAC) and *Mycobacterium abscessus* are the most common causative pathogens.<sup>2,3</sup> Current treatment regimens consist of at least three drugs for a duration of 18–24 months,<sup>1,4</sup> but treatment outcome is still poor. In meta-analyses, 50% (*M. abscessus*) to 70% (MAC) of patients who tolerate recommended regimens achieve prolonged culture conversion.<sup>5</sup> In

addition, this multidrug treatment is associated with significant adverse effects.<sup>6</sup>

The oxazolidinone linezolid is recommended as part of first-line treatment of *M. abscessus* disease and as a second-line treatment of MAC pulmonary disease.<sup>1</sup> Because of the necessity of prolonged treatment, the linezolid dose has to be lowered to avoid or delay adverse events.<sup>7</sup> Given linezolid's very high MICs (median 16 mg/L),<sup>8</sup> these low doses are unlikely to be effective.

Tedizolid is an oxazolidinone that, like linezolid, targets the 23S ribosomal RNA of the 50S ribosomal subunit.<sup>9</sup> Its favourable toxicity profile and superior penetration into epithelial lining fluid,

compared with linezolid, has already led to sporadic use in NTM-PD treatment.<sup>10–12</sup> A recent study using an intracellular hollow-fibre system infection model identified tedizolid as highly bactericidal against intracellular MAC,<sup>13</sup> but lower *in vitro* activity of tedizolid alone against *M. abscessus* is reported.<sup>8,14,15</sup>

Even with promising *in vitro* performance and toxicity profile, any new drug to be incorporated into NTM disease treatment regimens should have a firm preclinical basis, including at least measurements of synergy with established antimycobacterial drugs and intracellular activity.

Here, we assess the *in vitro* and *ex vivo* activity of tedizolid as well as synergism between tedizolid and key antimycobacterial drugs using the chequerboard method and time–kill kinetics assays.

## Methods

### Bacterial strains

*M. abscessus* subspecies *abscessus* CIP 104536, *Mycobacterium fortuitum* ATCC 6841, *M. avium* ATCC 700898, *Mycobacterium peregrinum* ATCC 700686, *Mycobacterium chimaera* DSM 44623, *Mycobacterium simiae* ATCC 25275 and *Mycobacterium intracellulare* DSM 43223 reference strains were purchased from their relevant culture collections. Clinical isolates were acquired from the collection of the Department of Medical Microbiology at Radboud University Medical Center, Nijmegen, The Netherlands. Isolates were stored in trypticase soy broth with 40% glycerol at  $-80^{\circ}\text{C}$  and freshly cultured before each experiment.

### Susceptibility and stability testing

MICs of tedizolid phosphate (the active moiety of tedizolid; henceforth referred to as tedizolid; MSD) were determined by broth microdilution in CAMHB (BD Biosciences, Drachten, the Netherlands) according to CLSI guidelines.<sup>16</sup> We tested concentrations ranging from 0.125 to 128 mg/L on a total of 113 NTM isolates (7 reference strains and 106 clinical isolates). MBCs were determined for reference strains of *M. abscessus* and *M. avium* by quantification of cfu for tedizolid concentrations that showed no visible growth in microdilution, on Middlebrook 7H10 agar plates (BD Biosciences). To determine whether tedizolid should be considered bacteriostatic or bactericidal, we calculated the MBC/MIC ratio and considered a ratio  $>8$  to be bacteriostatic, as previously described.<sup>17</sup> We tested tedizolid stability by pre-incubating broth microdilution assay plates for 7, 14 and 21 days at  $30^{\circ}\text{C}$  or  $37^{\circ}\text{C}$  before inoculating them with *M. abscessus* CIP 104536 or *M. avium* ATCC 700898, respectively. To assess a correlation between linezolid and tedizolid MIC, we  $\ln(x + 1)$  transformed the MIC values and performed a Spearman's  $\rho$  two-tailed correlation test using a Gaussian approximation.

### Synergy testing

We assessed synergy between tedizolid and other antimycobacterial drugs using the broth microdilution chequerboard method.<sup>18</sup> Tedizolid was evaluated against a total of 12 clinical and reference strains of NTM [tedizolid in combination with clarithromycin, cefoxitin, tigecycline or amikacin for rapidly growing mycobacteria (RGM; *M. abscessus*, *M. fortuitum*, *M. peregrinum* and *M. chelonae*) and tedizolid in combination with clarithromycin, rifampicin, ethambutol, amikacin or minocycline for *M. avium*] as previously described.<sup>19</sup> Drug interactions were interpreted according to the FIC index (FICI) and were classified as synergistic (FICI  $\leq 0.5$ ), having no interaction (FICI  $>0.5$ – $4.0$ ) or antagonistic (FICI  $>4.0$ ). We selected the most promising candidate antibiotics based on the FICI value for subsequent experiments in time–kill interaction assays.

### Time–kill kinetics assays

Time–kill kinetics assays were performed with *M. abscessus* and *M. avium* reference strains in duplicate. In short, bacteria were cultured in individual

bottles containing 10 mL of CAMHB with 0.05% Tween 80 and for *M. avium* 10% OADC growth supplement (BD Biosciences). We tested tedizolid concentrations ranging from  $0.25\times$  to  $32\times$  MIC and a growth control, all inoculated with a bacterial inoculum approximating  $10^5$ – $10^6$  cfu/mL and incubated at  $30^{\circ}\text{C}$  (for *M. abscessus*) or  $37^{\circ}\text{C}$  (*M. avium*), shaken constantly and ventilated through a filter. We used the following predetermined time-points: days 0, 1, 2, 3, 4, 5, 7, 14 and 21 for *M. abscessus* and an additional day 28 for *M. avium*. At these timepoints, the bacterial population of each bottle was quantified using a 10-fold serial dilution with triplicate spot-plating of each well on M7H10 agar plates. Plates were incubated at  $30^{\circ}\text{C}$  for 3 days for *M. abscessus* and at  $37^{\circ}\text{C}$  for 7 days for *M. avium*. Time–kill kinetics for tedizolid interactions were determined following the protocol described above. Single-drug tedizolid, companion and a tedizolid/companion combination were tested with three concentrations ( $0.5\times$ ,  $1\times$  and  $2\times$  MIC) in CAMHB. We defined a bactericidal effect as a  $>1$  log cfu decrease in the course of the interaction compared with the start inoculum. To assess the resistant *M. avium* and *M. abscessus* populations in the combination time–kill kinetics assays, we prepared Middlebrook 7H11 (M7H11) agar plates containing  $5\times$  MIC of the companion drug and, to assess some form of oxazolidinone resistance,  $5\times$  MIC of linezolid as an indicator for measuring emerging tedizolid resistance. M7H11 plates were prepared from powder (Sigma-Aldrich) according to the manufacturer's recommendation, with 10% OADC growth supplement and antibiotic added after autoclaving. Plates were inoculated as described before. Inoculated M7H11 plates were kept for 10 days at  $30^{\circ}\text{C}$  for *M. abscessus* and for 21 days at  $37^{\circ}\text{C}$  for *M. avium*.

### Response surface analysis

Response surface analysis to assess interaction according to Bliss independence was performed as previously described.<sup>20</sup> AUC was calculated from the log cfu versus time plots using the trapezoidal rule after averaging the result from the two replicates and normalizing to the baseline colony count. The effect was then calculated according to  $\text{effect}_x = \text{AUC}_{\text{growth control}} - \text{AUC}_x$ , where  $x$  is any given curve other than the growth control.

To assess potential interactions in the time–kill kinetics experiments we calculated the expected effect for a combination under Bliss independence ( $E_{\text{comb,BI}}$ ) to be compared with the observed effect ( $E_{\text{comb,obs}}$ ). Since Bliss independence builds on probability theory, the maximum effect to be evaluated is limited to 1 and therefore all effects were normalized to the  $E_{\text{max}}$  of the most potent drug (tedizolid). After simplification this gives the following formula:  $E_{\text{comb,BI}} = E_A + E_B - (E_A \times E_B) / E_{\text{max,high}}$ , where  $E_A$  and  $E_B$  are the effect sizes of drug A or B separately and  $E_{\text{max,high}}$  is the highest maximum effect. The  $E_{\text{max}}$  of tedizolid was determined by fitting a sigmoidal  $E_{\text{max}}$  model to the concentration–response data using ordinary least squares.

The difference between observed and expected effect ( $\Delta E$ ) was quantified as a percentage difference relative to the expected:  $\Delta E = (E_{\text{comb,obs}} - E_{\text{comb,BI}}) / E_{\text{comb,BI}}$ . We defined a  $\Delta E$  of  $\pm 10\%$  as no interaction, anything less than  $-10\%$  was defined as antagonistic and anything more than  $10\%$  was defined as synergistic.

### Ex vivo intracellular assays

PBMCs were isolated from buffy coats obtained from three healthy volunteers (Sanquin Bloodbank, Nijmegen, The Netherlands). Informed consent from these volunteers was obtained for use of their blood for scientific purposes, as approved by the Ethics Committee of Radboud University Medical Center, Nijmegen, The Netherlands. Macrophage differentiation was performed as described previously.<sup>21</sup> One day prior to the experiment, cells were dissociated and re-seeded in antibiotic-free medium in a 96-well plate ( $1 \times 10^5$  cells/well).

On the day of infection, the cell culture medium was removed and *M. avium* was added to the macrophages at an moi of 1:5 (cells:bacteria), and *M. abscessus* was added at an moi of 1:1. The macrophages were

incubated with mycobacteria for 1 h at 37°C to allow phagocytosis before medium was changed to RPMI supplemented with 10% human pooled serum. Tedizolid was added at 2× MIC and was present for the remainder of the experiment. At the indicated timepoints, the number of extracellular bacteria was quantified through plating of the supernatant on Middlebrook 7H10 agar for cfu counts. To determine the number of intracellular bacteria, macrophages were washed with warm PBS and then subjected to hypotonic lysis in sterile water for 10 min. The intracellular fraction was then also quantified through serial dilutions and plating of the different dilutions on Middlebrook 7H10 plates. All samples were analysed in triplicate.

## Statistics

Calculations were performed using GraphPad Prism version 5.03 (GraphPad Software Inc., La Jolla, CA, USA) or R version 3.1.2 (R Foundation for Statistical Computing, Vienna, Austria; <https://www.R-project.org/>). Error bars in the figures show SEMs.

## Results

### MICs, MBCs and stability

The MICs of tedizolid for clinically relevant NTM are given in Table 1. MICs were generally lower for RGM than for slowly growing mycobacteria (SGM). For both *M. abscessus* (Figure 1a and b) and *M. avium* (Figure 1c and d), there is a trend visible for more potent *in vitro* activity of tedizolid compared with linezolid against NTM. For *M. abscessus*, tedizolid and linezolid MICs are not correlated (Spearman's  $\rho = 0.2304$ ,  $P = 0.1192$ ; Figure 1e), but they are correlated for *M. avium* (Spearman's  $\rho = 0.5921$ ,  $P < 0.0001$ ; Figure 1f). Individual linezolid and tedizolid MICs per isolate are given in Table S1 (available as [Supplementary data](#) at JAC Online). All wells without visible growth still produced cfu after plating, regardless of organism, leading to an MBC of >128 mg/L for both *M. avium* and *M. abscessus* and MBC/MIC ratios of 16 for *M. avium* and 32–64 for *M. abscessus*, defining tedizolid as bacteriostatic. Tedizolid MICs remained stable for *M. abscessus* and *M. avium* after a pre-incubation period of 7 days,

but, after 14 days of pre-incubation, we measured increasing tedizolid MICs as well as some sedimentation at higher concentrations (Table S1).

### Synergism of tedizolid with other drugs

FICIs of tedizolid combinations are shown in Table 2. For *M. abscessus*, the tedizolid/amikacin combination yielded the lowest FICI (average = 0.75; range = 0.56–1). Notably, the lowest FICI for tedizolid/amikacin was observed for the *M. abscessus* reference strain (FICI = 0.56). Though the initial synergism between tedizolid and clarithromycin seemed promising, it was rapidly abrogated by emergence of induced clarithromycin resistance facilitated by the *erm(41)* gene. From this, we chose amikacin as a combination drug for subsequent time-kill assays against *M. abscessus*. A combination of tedizolid and ceftiofloxacin was synergistic against *M. fortuitum* (FICI = 0.375) and a tedizolid/tigecycline combination was synergistic against *M. peregrinum* (FICI = 0.375).

Tedizolid had no average synergistic interaction for MAC isolates, but had isolated FICIs of 0.5 (Table 2). The lowest average FICI was found in combination with ethambutol (average = 0.72; range = 0.5–1). From this, we chose ethambutol as a combination drug for subsequent time-kill assays against *M. avium*. We observed no antagonistic interactions.

### Time-kill kinetics assays

The time-kill kinetics for *M. abscessus* are shown in Figure 2(a) for the tedizolid dose-response assay and Figure 2(b) for the companion time-kill kinetics for the tedizolid/amikacin combination assay. All conditions of tedizolid show growth until day 2, after which the bacterial loads remain static until day 5 or continued a slightly inhibited growth following a concentration-dependent pattern. Notably, the 32× MIC combination shows the second highest bacterial load by day 21. The combination time-kill kinetics assays in Figure 2(b) show over the course of the experiment that the

**Table 1.** Tedizolid and linezolid MICs for clinical isolates of SGM and RGM, in CAMHB; for SGM, the broth was enriched with 10% OADC growth supplement

| Organism                           | n  | MIC <sub>50</sub> /MIC <sub>90</sub> or MIC (mg/L) | Tedizolid | Linezolid |
|------------------------------------|----|----------------------------------------------------|-----------|-----------|
| <b>RGM</b>                         |    |                                                    |           |           |
| <i>M. abscessus</i>                | 47 | MIC <sub>50</sub> /MIC <sub>90</sub>               | 2/8       | 8/>32     |
| <i>M. abscessus</i> CIP 104536     |    | MIC                                                | 4         | >32       |
| <i>M. fortuitum</i>                | 2  | MIC                                                | 0.25      | 2         |
| <i>M. fortuitum</i> ATCC 6841      |    | MIC                                                | 2         | 8         |
| <i>M. peregrinum</i> ATCC 700686   | 2  | MIC                                                | 1         | NA        |
| <i>Mycobacterium chelonae</i>      |    | MIC                                                | 0.5–1     | 8–16      |
| <b>SGM</b>                         |    |                                                    |           |           |
| <i>M. avium</i>                    | 51 | MIC <sub>50</sub> /MIC <sub>90</sub>               | 2/16      | 16/32     |
| <i>M. avium</i> ATCC 700898        |    | MIC                                                | 8         | 16        |
| <i>M. chimaera</i>                 | 2  | MIC                                                | 4         | 8–16      |
| <i>M. chimaera</i> DSM 44623       |    | MIC                                                | 1         | 4         |
| <i>M. intracellulare</i>           | 2  | MIC                                                | 4–8       | 16–32     |
| <i>M. intracellulare</i> DSM 43223 |    | MIC                                                | 2         | <1        |
| <i>M. simiae</i> ATCC 25275        |    | MIC                                                | 2         | 16        |

NA, not applicable.

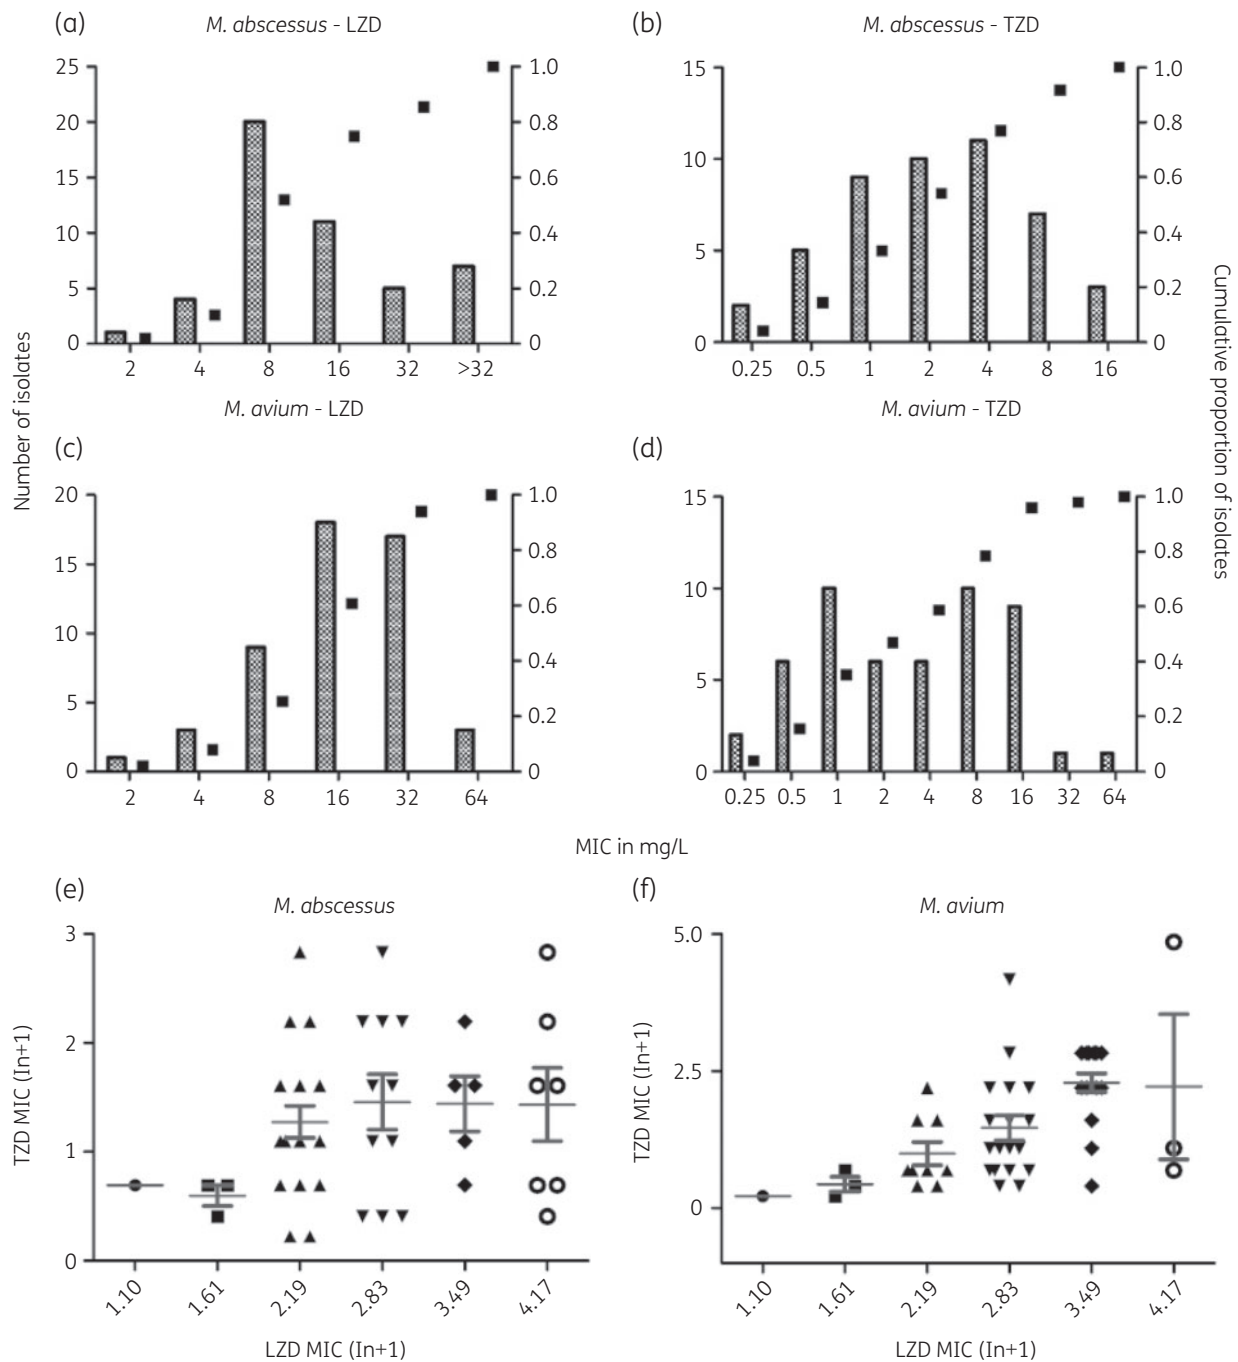

**Figure 1.** MIC distributions of linezolid and tedizolid for clinical isolates of *M. abscessus* ( $n = 47$ ) and *M. avium* ( $n = 51$ ). (a) Linezolid MIC distribution for *M. abscessus*. (b) Tedizolid MIC distribution for *M. abscessus*. (c) Linezolid MIC distribution for *M. avium*. (d) Tedizolid MIC distribution for *M. avium*. (e) Correlation between linezolid MIC and tedizolid MIC for *M. abscessus*. MICs were not correlated ( $n = 47$ , Spearman's  $\rho = 0.2304$ , two tailed,  $P = 0.1192$ ). (f) Correlation between linezolid MIC and tedizolid MIC for *M. avium*. MICs are correlated ( $n = 51$ , Spearman's  $\rho = 0.5921$ , two tailed,  $P < 0.0001$ ). LZD, linezolid; TZD, tedizolid.

combination conditions have a consistently lower bacterial burden than the single-drug conditions and the  $2\times$  MIC combination condition has a static bacterial burden until day 10. An exception to this overall trend is the  $0.5\times$  MIC combination condition, which does not seem to prolong the bacteriostatic activity compared with the single-drug conditions. Compared with tedizolid, amikacin

shows a more pronounced bacteriostatic effect, but all conditions show sustained growth by day 10. The percentage of the amikacin-resistant population is shown in Figure 2(c). All treatment conditions induced amikacin resistance, but conditions treated with amikacin showed the highest resistant subpopulation. The percentage of the linezolid-resistant subpopulation as a proxy for



**Table 2.** FICIs of tedizolid in combination with clarithromycin, ceftioxin, tigecycline or amikacin for RGM, and tedizolid in combination with clarithromycin, rifampicin, ethambutol, amikacin or minocycline for *M. avium*

| Combination              | <i>M. abscessus</i> (n = 5) |                 | <i>M. fortuitum</i> (n = 1) | <i>M. peregrinum</i> (n = 1) | <i>M. chelonae</i> (n = 1) |
|--------------------------|-----------------------------|-----------------|-----------------------------|------------------------------|----------------------------|
|                          | average FICI                | range (min–max) | FICI                        | FICI                         | FICI                       |
| Tedizolid/clarithromycin | 0.53                        | 0.28–0.625      | 0.75                        | 1                            | 1                          |
| Tedizolid/ceftioxin      | 0.81                        | 0.56–1          | 0.375                       | 0.625                        | 0.5                        |
| Tedizolid/tigecycline    | 1.01                        | 0.56–1.25       | 1                           | 0.375                        | 0.625                      |
| Tedizolid/amikacin       | 0.75                        | 0.56–1          | 0.75                        | 0.5                          | 0.75                       |

  

| Combination              | MAC (n = 4)  |                 |
|--------------------------|--------------|-----------------|
|                          | average FICI | range (min–max) |
| Tedizolid/clarithromycin | 1            | 0.75–1.25       |
| Tedizolid/rifampicin     | 1.25         | 0.5–2.5         |
| Tedizolid/ethambutol     | 0.72         | 0.5–1           |
| Tedizolid/amikacin       | 0.81         | 0.5–1           |
| Tedizolid/minocycline    | 0.78         | 0.625–1         |

the tedizolid-resistant subpopulation is shown in Figure 2(d). No clear trends are visible and all conditions induce linezolid resistance similarly.

The time–kill kinetics for *M. avium* are shown in Figure 3(a) for the tedizolid dose–response assay and Figure 3(b) for the companion time–kill kinetics for the tedizolid/ethambutol combination assay. At concentrations higher than 1× MIC, tedizolid achieves at least >1 log kill by day 28. Notably, the 4× MIC condition does not follow the same dose–response trend and has a higher bacterial burden on day 28 than the 2× MIC condition. The combination time–kill kinetics assays in Figure 3(b) show that, overall, the combination conditions have a lower bacterial burden than the single-drug conditions and all conditions follow a dose–response distribution. In most combination conditions, we observe that the SEM exceeds 1 log at some point, indicating high variability between samples. Both the 1× MIC and 2× MIC combination conditions end on a par with the 2× MIC tedizolid condition on day 28. We did not detect a linezolid-resistant subpopulation in any of the conditions (data not shown).

### Response surface analysis

The sigmoidal  $E_{max}$  curves for tedizolid on *M. abscessus* and *M. avium* are shown in Figure S1(a) and Figure S1(b), respectively. For *M. abscessus*, the fitted  $E_{max}$  was  $34.1 \log_{10} \text{ cfu/mL} \times \text{day}$ , the  $EC_{50}$  was  $0.73 \times \text{MIC}$  and the estimated Hill slope was 2.63. For *M. avium*, the fitted  $E_{max}$  was  $176 \log_{10} \text{ cfu/mL} \times \text{day}$ , the  $EC_{50}$  was  $0.94 \times \text{MIC}$  and the estimated Hill slope was 0.84. The calculated  $\Delta E$  percentages as well as  $E_{comb,obs}$ ,  $E_{comb,BI}$  and the effect sizes of the companion drugs in the combination time–kill kinetics assays are shown in Table 3.

The combination of tedizolid and amikacin against *M. abscessus* had an antagonistic interaction at low concentrations ( $\Delta E = -126\%$ ) and was synergistic at higher concentrations ( $\Delta E = 39.7\%$ ). This is mainly because of a prolonged lower cfu count from day 6 onwards, after which the 2× MIC tedizolid/amikacin condition performed better than the single-drug conditions as it prevented regrowth. For *M. avium*, the interaction between

tedizolid and ethambutol is considered synergistic at lower concentrations ( $\Delta E = 42.3\%$ ) and turns slightly antagonistic at higher concentrations ( $\Delta E = -13.4\%$ ).

### Ex vivo intracellular assays

Intracellular and extracellular cfu/mL counts of *M. avium* are shown in Figure 4(a). Tedizolid reduced the intracellular bacterial load by 66% below stasis over the course of 6 days. The extracellular bacterial population was comparatively low (2% of total cfu counts). Intracellular and extracellular cfu/mL counts of *M. abscessus* are shown in Figure 4(b). Overall, tedizolid could hold the bacterial load static compared with the non-treated control over the course of 3 days. Especially on day 2, we observe a large extracellular *M. abscessus* population in the non-treated controls, but not in the treated conditions. By day 3, the intracellular bacterial load of the treated conditions is lower by a factor of 500 than the non-treated condition. Notably, little extracellular bacterial load is detected in the tedizolid-treated conditions.

### Discussion

Tedizolid holds promise as the successor to linezolid in the treatment of mycobacterial diseases, because of its increased *in vitro* activity<sup>8</sup> and lower toxicity in treatment of other bacterial infections, compared with linezolid.<sup>12,22</sup> Linezolid is recommended in *M. abscessus* therapy and is a second-line agent in MAC disease treatment,<sup>1</sup> although there are no clinical data supporting its efficacy. A more active and better-tolerated alternative to linezolid is desirable. In this study, we confirm previous MIC distribution data for MAC and *M. abscessus* found by Brown-Elliott and Wallace<sup>8</sup> and also find that tedizolid generally has a lower MIC than linezolid. Notably, the tedizolid MIC distribution for *M. avium* seems to be bimodal, emphasizing the need to perform *in vitro* drug susceptibility testing. The mechanistic background underlying this bimodal MIC distribution requires further study. Tedizolid showed concentration-dependent activity against *M. avium* and bacteriostatic activity against

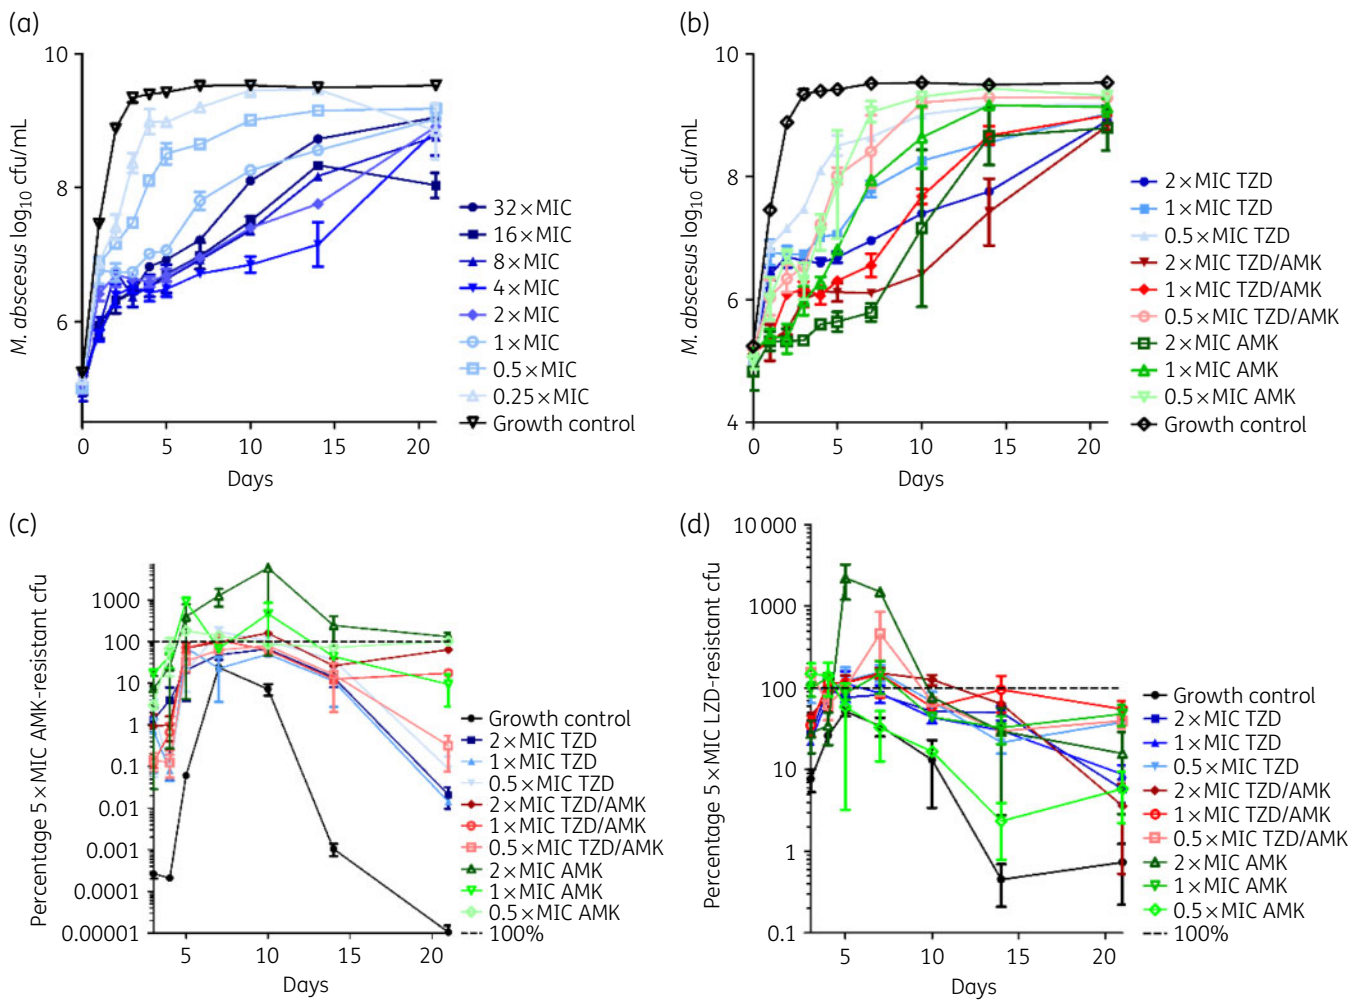

**Figure 2.** Time-kill kinetics of tedizolid against *M. abscessus* CIP 104536. (a) Dose-response of tedizolid (MIC = 4 mg/L). (b) Combination time-kill kinetics of tedizolid and amikacin (MIC = 32 mg/L). (c) Percentage of the 5x MIC amikacin-resistant subpopulation of (b). (d) Percentage of the 5x MIC linezolid-resistant subpopulation of (b). AMK, amikacin; LZD, linezolid; TZD, tedizolid.

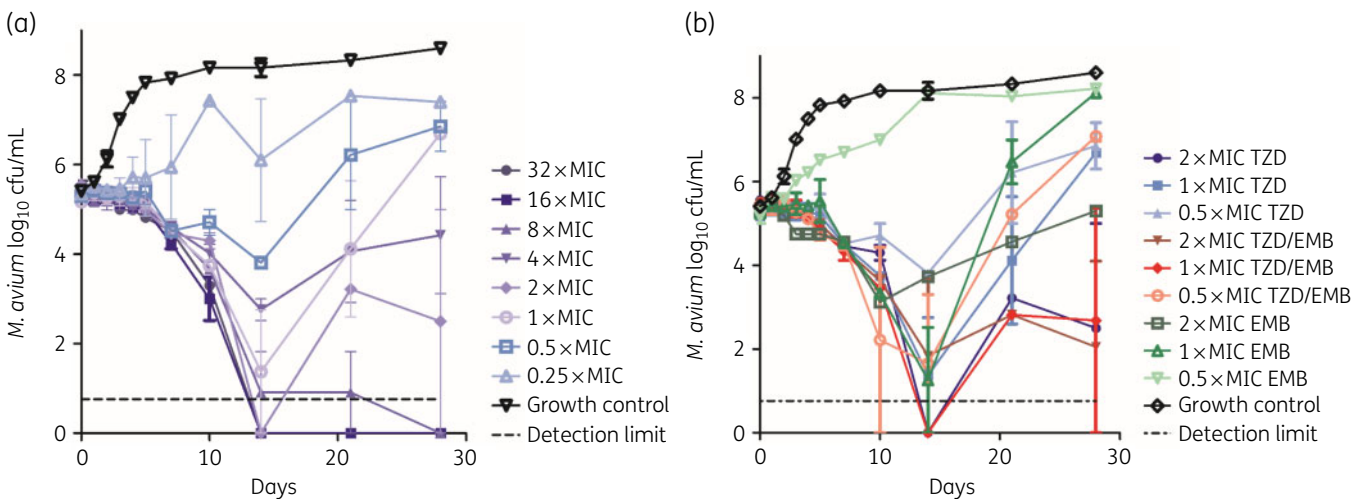

**Figure 3.** Time-kill kinetics of tedizolid against *M. avium* ATCC 700898. (a) Dose-response of tedizolid (MIC = 8 mg/L). (b) Combination time-kill kinetics of tedizolid and ethambutol (MIC = 4 mg/L). EMB, ethambutol; TZD, tedizolid.

**Table 3.** Response surface analysis results, as well as interaction effect size, by deviation from expected combination effect under Bliss independence in percentage  $\Delta E$

| Combination (concentration)             | Effect ( $\log_{10}$ cfu/mL $\times$ day) |                        |                       |                                    | $\Delta E$ (%) |
|-----------------------------------------|-------------------------------------------|------------------------|-----------------------|------------------------------------|----------------|
|                                         | tedizolid                                 | amikacin or ethambutol | observed, combination | expected, combination <sup>a</sup> |                |
| <i>M. abscessus</i>                     |                                           |                        |                       |                                    |                |
| tedizolid/amikacin (0.5 $\times$ MIC)   | 8.93                                      | -95.6                  | 16.3                  | 62.2                               | -126           |
| tedizolid/amikacin (1 $\times$ MIC)     | 22.6                                      | 24.2                   | 33.7                  | 31.1                               | 8.24           |
| tedizolid/amikacin (2 $\times$ MIC)     | 34.8                                      | 35.6                   | 48.8                  | 34.9                               | 39.7           |
| <i>M. avium</i>                         |                                           |                        |                       |                                    |                |
| tedizolid/ethambutol (0.5 $\times$ MIC) | 65.8                                      | 9.39                   | 102                   | 71.6                               | 42.3           |
| tedizolid/ethambutol (1 $\times$ MIC)   | 96.5                                      | 81.8                   | 145                   | 133                                | 8.81           |
| tedizolid/ethambutol (2 $\times$ MIC)   | 137                                       | 95.1                   | 137                   | 159                                | -13.4          |

<sup>a</sup>Under Bliss independence.

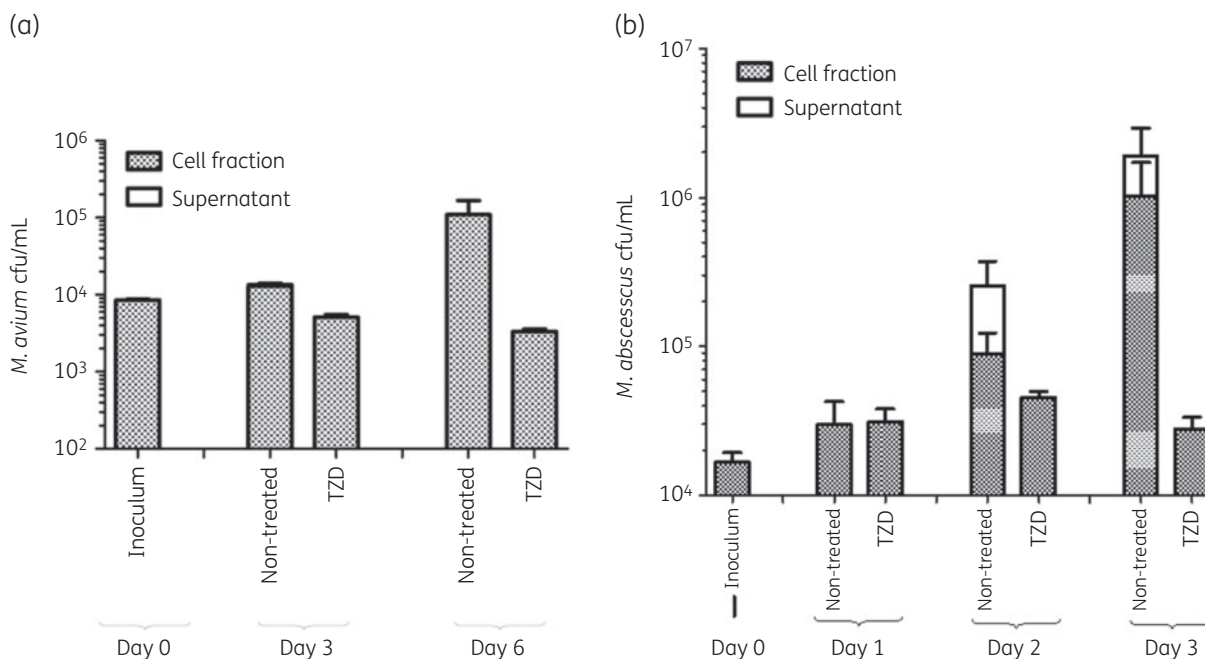

**Figure 4.** Ex vivo infection assays of mycobacteria-infected macrophages treated with and without tedizolid (2  $\times$  MIC). (a) Intracellular and extracellular cfu counts of *M. avium*. (b) Intracellular and extracellular cfu counts of *M. abscessus*. TZD, tedizolid.

*M. abscessus* in time-kill experiments and promising intracellular activity against both *M. avium* and *M. abscessus*.

With our time-kill experiments with *M. abscessus*, we confirm a study performed by Compain *et al.*,<sup>14</sup> who report modest exposure-dependent activity of tedizolid. Combination experiments with tedizolid and amikacin reveal modest, concentration-dependent synergy relative to Bliss independence. Tedizolid's potential is further supported by its performance alone in human macrophages, where it holds the bacterial burden static over 3 days at 2  $\times$  MIC. A previous study showed similar tedizolid activity against *M. abscessus*, in THP-1 cells.<sup>15</sup>

For *M. avium*, few *in vitro* studies beyond MIC determinations are available. The aforementioned hollow-fibre system study by Deshpande *et al.*<sup>13</sup> shows intracellular killing of 2.0  $\log_{10}$  cfu/mL

over 14 days, which translates well to our observed killing effect in time-kill assays. These researchers also assessed tedizolid together with a ceftazidime/avibactam + rifabutin + moxifloxacin combination in a hollow-fibre system infection model, reporting a stronger killing effect than an azithromycin/ethambutol/rifabutin regimen.<sup>23</sup> Though these results are promising, adding tedizolid to the standard regimen or exploiting our observed synergism with ethambutol by replacing rifampicin might be an approach more translatable to clinical trials.

Translating *in vitro* findings to the clinical reality is challenging, especially when integrating tedizolid in a multidrug regimen exploiting its synergism with ethambutol. Deshpande *et al.*<sup>13</sup> propose a dose of 200 mg daily if no interacting co-medication is used, treating *M. avium*-infected THP-1 cells in a hollow-fibre

system. Based on this study, Deshpande et al.<sup>13</sup> suggested a tedizolid breakpoint of 1 mg/L. Based on our MIC distribution data, a 1 mg/L breakpoint would define <40% of MAC isolates as susceptible.

A more favourable safety profile of tedizolid versus linezolid has only been established for a 200 mg/day dose for up to 6 days;<sup>24</sup> the safety profile of prolonged administration of higher doses is uncertain. The efficacy and long-term safety of different tedizolid doses within multidrug regimens should be investigated in pharmacodynamic models and ultimately clinical trials.

Our study has several limitations to consider. Most importantly, all our assays are static assays where drug is added only at the beginning and not continuously, making human pharmacokinetics impossible to model. A hollow-fibre system experiment might be interesting, especially if assessing the tedizolid/ethambutol synergism as well as counteracting drug stability issues and medium exhaustion. The high proportion of resistant cfu in the resistance monitoring assays surpassing 100% remains unexplained. Regrettably, we could also not monitor the linezolid resistance in *M. avium* time–kill assays. For this, lower concentrations of linezolid (3× MIC) might have been helpful. Also, linezolid was merely used as a proxy for tedizolid resistance and it might not mirror the actual resistance to tedizolid in *M. abscessus* resistance monitoring, possibly leading to an overestimation of resistance in these assays. Lastly, translating MICs, synergy and time–kill kinetics to possible clinical efficacy is challenging, especially for *M. fortuitum* and *M. peregrinum*, where we only tested the reference strains. Ideally, this will be established in a stepwise process of hollow-fibre system studies and clinical trials.

Concluding, we confirmed tedizolid as a potent asset in MAC pulmonary disease treatment; it is less active against *M. abscessus*, but still interesting as a replacement for linezolid. With the observed synergistic interactions, especially with ethambutol, a tedizolid/ethambutol/azithromycin regimen might be an interesting candidate regimen for further pharmacodynamic studies and ultimately clinical trials in MAC pulmonary disease.

## Acknowledgements

We thank MSD for kindly providing us with tedizolid phosphate and appreciate the collaboration.

## Funding

Jakko van Ingen is supported by a personal grant from the Netherlands Organization for Scientific Research (NWO/ZonMW grant Veni 016.176.024). This grant funded laboratory equipment as well as consumables used in this study.

## Transparency declarations

None to declare.

## Supplementary data

Table S1 and Figure S1 are available as [Supplementary data](#) at JAC Online.

## References

- Griffith DE, Aksamit T, Brown-Elliott BA et al. An official ATS/IDSA statement: diagnosis, treatment, and prevention of nontuberculous mycobacterial diseases. *Am J Respir Crit Care Med* 2007; **175**: 367–416.
- Hoefsloot W, van Ingen J, Andrejak C et al. The geographic diversity of nontuberculous mycobacteria isolated from pulmonary samples: an NTM-NET collaborative study. *Eur Respir J* 2013; **42**: 1604–13.
- Stout JE, Koh W-J, Yew WW. Update on pulmonary disease due to nontuberculous mycobacteria. *Int J Infect Dis* 2016; **45**: 123–34.
- Floto RA, Olivier KN, Saiman L et al. US Cystic Fibrosis Foundation and European Cystic Fibrosis Society consensus recommendations for the management of non-tuberculous mycobacteria in individuals with cystic fibrosis: executive summary. *Thorax* 2016; **71**: 88–90.
- van Ingen J, Ferro BE, Hoefsloot W et al. Drug treatment of pulmonary nontuberculous mycobacterial disease in HIV-negative patients: the evidence. *Expert Rev Anti Infect Ther* 2013; **11**: 1065–77.
- Philly JV, Griffith DE. Management of nontuberculous mycobacterial (NTM) lung disease. *Semin Respir Crit Care Med* 2013; **34**: 135–42.
- Winthrop KL, Ku JH, Marras TK et al. The tolerability of linezolid in the treatment of nontuberculous mycobacterial disease. *Eur Respir J* 2015; **45**: 1177–9.
- Brown-Elliott BA, Wallace RJ. *In vitro* susceptibility testing of tedizolid against nontuberculous mycobacteria. *J Clin Microbiol* 2017; **55**: 1747–54.
- Burdette SD, Trotman R. Tedizolid: the first once-daily oxazolidinone class antibiotic. *Clin Infect Dis* 2015; **61**: 1315–21.
- Conte JE Jr, Golden JA, Kipps J et al. Intrapulmonary pharmacokinetics of linezolid. *Antimicrob Agents Chemother* 2002; **46**: 1475–80.
- Housman ST, Pope JS, Russomanno J et al. Pulmonary disposition of tedizolid following administration of once-daily oral 200-milligram tedizolid phosphate in healthy adult volunteers. *Antimicrob Agents Chemother* 2012; **56**: 2627–34.
- Yuste JR, Bertó J, Del Pozo JL et al. Prolonged use of tedizolid in a pulmonary non-tuberculous mycobacterial infection after linezolid-induced toxicity. *J Antimicrob Chemother* 2017; **72**: 625–8.
- Deshpande D, Srivastava S, Pasipanodya JG et al. Tedizolid is highly bactericidal in the treatment of pulmonary *Mycobacterium avium* complex disease. *J Antimicrob Chemother* 2017; **72** Suppl 2: ii30–5.
- Compain F, Soroka D, Heym B et al. *In vitro* activity of tedizolid against the *Mycobacterium abscessus* complex. *Diagn Microbiol Infect Dis* 2018; **90**: 186–9.
- Le Run E, Arthur M, Mainardi J-L. *In vitro* and intracellular activity of imipenem combined with tedizolid, rifabutin, and avibactam against *Mycobacterium abscessus*. *Antimicrob Agents Chemother* 2019; **63**: e01915–18.
- CLSI. *Susceptibility Testing of Mycobacteria, Nocardiae, and Other Aerobic Actinomycetes—Second Edition*: M24. 2011.
- Ruth MM, Sangen JJN, Pennings LJ et al. Minocycline has no clear role in the treatment of *Mycobacterium abscessus* disease. *Antimicrob Agents Chemother* 2018; **62**: e01208–18.
- Odds FC. Synergy, antagonism, and what the checkerboard puts between them. *J Antimicrob Chemother* 2003; **52**: 1.
- Ruth MM, Sangen JJN, Remmers K et al. A bedaquiline/clofazimine combination regimen might add activity to the treatment of clinically relevant non-tuberculous mycobacteria. *J Antimicrob Chemother* 2019; **74**: 935–43.
- Wicha SG, Kees MG, Kuss J et al. Pharmacodynamic and response surface analysis of linezolid or vancomycin combined with meropenem against *Staphylococcus aureus*. *Pharm Res* 2015; **32**: 2410–8.



- 21** Ruth MM, Magombedze G, Gumbo T *et al.* Minocycline treatment for pulmonary *Mycobacterium avium* complex disease based on pharmacokinetics/pharmacodynamics and Bayesian framework mathematical models. *J Antimicrob Chemother* 2019; **74**: 1952–61.
- 22** Hall RG, Smith WJ, Putnam WC *et al.* An evaluation of tedizolid for the treatment of MRSA infections. *Expert Opin Pharmacother* 2018; **19**: 1489–94.
- 23** Deshpande D, Srivastava S, Pasipanodya JG *et al.* A novel ceftazidime/avibactam, rifabutin, tedizolid and moxifloxacin (CARTM) regimen for pulmonary *Mycobacterium avium* disease. *J Antimicrob Chemother* 2017; **72** Suppl 2: ii48–53.
- 24** Lan S-H, Lin W-T, Chang S-P *et al.* Tedizolid versus linezolid for the treatment of acute bacterial skin and skin structure infection: a systematic review and meta-analysis. *Antibiotics (Basel)* 2019; **8**: E137.
